# Supplementary material
Source: publisher figshare collection journal article supplement (https://sage.figshare.com/ndownloader/files/15254867)
Supplement: Supplementary file 1 [file 15254867]

Appendix 2: Thematic Analysis

Table 3. Example of the coding process.

| Examples of dataset-specific coding      | Sub-theme                                                                      | Overarching theme                                |
|------------------------------------------|--------------------------------------------------------------------------------|--------------------------------------------------|
| Suggestions about diet                   | Providing recommendations to improve quality of life                           | An educator about the disease and its management |
| Suggestions about exercise               |                                                                                |                                                  |
| Suggestions about home adaptation        |                                                                                |                                                  |
| Information about support groups         | Providing information about resources available to patients and care providers |                                                  |
| Directing towards psychological services |                                                                                |                                                  |
| Information about prognosis              | Educating about the disease characteristics and natural history                |                                                  |
| Explaining why symptoms occur            |                                                                                |                                                  |

Table 4. Thematic map with prevalence of sub-themes for patients and care providers.

| <b>Overarching theme and its definition</b>                                                                                                                                                                                                                    | <b>Sub-theme</b>                                                                       | <b>Patient (n/19)</b> | <b>Care Provider (n/10)</b> |
|----------------------------------------------------------------------------------------------------------------------------------------------------------------------------------------------------------------------------------------------------------------|----------------------------------------------------------------------------------------|-----------------------|-----------------------------|
| A source of hope for therapeutic advances:<br><br>"Generating hope by being a link to information about research and emerging therapies that could impact future care."                                                                                        | Providing information about the state of research and clinical trials                  | 6                     | 2                           |
|                                                                                                                                                                                                                                                                | Providing information about emerging therapies                                         | 10                    | 6                           |
|                                                                                                                                                                                                                                                                | Fostering a sense of optimism for the future                                           | 6                     | 6                           |
| An educator about the disease and its management:<br><br>"Educating the patient and care provider about all aspects of MS in general and specifically as it relates to the patient, insofar as this knowledge is current and not related to ongoing research." | Educating about the disease characteristics and natural history                        | 7                     | 3                           |
|                                                                                                                                                                                                                                                                | Providing recommendations to improve quality of life                                   | 4                     | 3                           |
|                                                                                                                                                                                                                                                                | Providing information about resources available to patients and care providers         | 2                     | 1                           |
|                                                                                                                                                                                                                                                                | Providing updates on disease progression                                               | 6                     | 2                           |
|                                                                                                                                                                                                                                                                | Providing perspective about information obtained from external sources (e.g. internet) | 3                     | 2                           |
| A source of support:<br><br>"Providing emotional and instrumental support to the patient and care provider as well as all the qualities that are deemed necessary for the provision of this support."                                                          | Active listening                                                                       | 5                     | 1                           |
|                                                                                                                                                                                                                                                                | Good bedside manners                                                                   | 6                     | 3                           |
|                                                                                                                                                                                                                                                                | Demonstrating compassion                                                               | 2                     | 2                           |
|                                                                                                                                                                                                                                                                | Ensuring regular follow-up                                                             | 5                     | 2                           |
|                                                                                                                                                                                                                                                                | Explicitly offering support                                                            | 4                     | 1                           |
|                                                                                                                                                                                                                                                                | Being open-minded regarding patient initiatives                                        | 3                     | 2                           |
|                                                                                                                                                                                                                                                                | Being accessible                                                                       | 3                     | 2                           |
